# Supplementary material
Source: publisher figshare collection journal article supplement (https://karger.figshare.com/ndownloader/files/10415940)
Supplement: Supplementary file 1 [file 10415940]

Table S1. Statin medications in patients taking statins at baseline

|  | Nintedanib  (n=192) | Placebo  (n=120) |
| --- | --- | --- |
| Simvastatin | 63 (32.8) | 37 (30.8) |
| Atorvastatin calcium | 51 (26.6) | 25 (20.8) |
| Rosuvastatin calcium | 29 (15.1) | 26 (21.7) |
| Pravastatin | 8 (4.2) | 9 (7.5) |
| Inegy® (simvastatin and ezetimibe) | 11 (5.7) | 4 (3.3) |
| Pravastatin sodium | 7 (3.6) | 8 (6.7) |
| Atorvastatin | 8 (4.2) | 4 (3.3) |
| Lovastatin | 5 (2.6) | 1 (0.8) |
| Fluvastatin sodium | 3 (1.6) | 1 (0.8) |
| Rosuvastatin | 2 (1.0) | 2 (1.7) |
| Pitavastatin calcium | 1 (0.5) | 3 (2.5) |
| Caduet® (amlodipine besylate and atorvastatin calcium) | 2 (1.0) | 1 (0.8) |
| Amlodipine with atorvastatin | 1 (0.5) | 0 (0.0) |
| Fluvastatin | 1 (0.5) | 0 (0.0) |
| Pravigard™ (buffered aspirin and pravastatin sodium) | 1 (0.5) | 0 (0.0) |
